# Supplementary material
Source: MDPI journal article supplement (https://www.mdpi.com/2071-1050/8/4/311)
Supplement: s1 [file s1]

# Supplementary Materials: School Facilities and Sustainability-Related Concepts: A Study of Hellenic Secondary School Principals', Teachers', Pupils' and Parents' Responses

Vasiliki Zepatou, Maria Loizidou, Archontoula Chaloulakou and Nicolas Spyrellis

The following supplementary materials to the above-titled article consist of 13 Tables: Tables S1 to Tables S13, as listed in the article. Tables S1–S9 are Crosstabulations of survey variables and the results of Chi-square tests of independence conducted for the variables. These particular results are cases in which dependency was found between variables and are reported and discussed in the main text of the article. Tables S10–S13 are the four Rotated Component Matrices of PCA, conducted respectively for the four school user groups: principals, teachers, pupils and parents.

**Table S1.** DSBA\* Quality of School Building and materials Crosstabulation, Chi-square tests & Symmetric Measures: Principals.

|                                       |            | Quality of School Building and Materials |      |                       |       |
|---------------------------------------|------------|------------------------------------------|------|-----------------------|-------|
|                                       | DSBA       | Bad                                      | Fair | Good                  | Total |
| Old                                   | Count      | 4                                        | 29   | 19                    | 52    |
|                                       | Exp. Count | 4.8                                      | 21.4 | 25.8                  | 52.0  |
|                                       | Residual   | –0.8                                     | 7.6  | –6.8                  |       |
| New                                   | Count      | 8                                        | 24   | 45                    | 77    |
|                                       | Exp. Count | 7.2                                      | 31.6 | 38.2                  | 77.0  |
|                                       | Residual   | 0.8                                      | –7.6 | 6.8                   |       |
| Total                                 | Count      | 12                                       | 53   | 64                    | 129   |
|                                       | Exp. Count | 12.0                                     | 53.0 | 64.0                  | 129.0 |
| Chi-square Tests & Symmetric Measures |            |                                          |      |                       |       |
|                                       |            | Value                                    | df   | Asymp. Sig. (2-sided) |       |
| Pearson Chi-square                    |            | 7.816 <sup>1</sup>                       | 2    | 0.020                 |       |
| Likelihood Ratio                      |            | 7.830                                    | 2    | 0.020                 |       |
| Phi                                   |            | 0.246                                    | –    | 0.020                 |       |
| Cramer's V                            |            | 0.246                                    | –    | 0.020                 |       |
| <i>n</i> of valid cases               |            | 129                                      |      |                       |       |

<sup>1</sup> 1 cell (16.7%) has expected count less than 5. The minimum expected count is 4.84.

**Table S2.** DSBA\* Quality of School Building and materials Crosstabulation, Chi-square tests & Symmetric Measures: Teachers.

| Quality of School Building And Materials |            |                  |      |       |                     |           |                       |
|------------------------------------------|------------|------------------|------|-------|---------------------|-----------|-----------------------|
| DSBA                                     |            | Unacceptably Bad | Bad  | Fair  | Good                | Very good | Total                 |
| Old                                      | Count      | 8                | 11   | 45    | 46                  | 0         | 110                   |
|                                          | Exp. Count | 6.1              | 6.5  | 40.2  | 47.1                | 10.0      | 110.0                 |
|                                          | Residual   | 1.9              | 4.5  | 4.8   | -1.1                | -10.0     |                       |
| New                                      | Count      | 8                | 6    | 60    | 77                  | 26        | 177                   |
|                                          | Exp. Count | 9.9              | 10.5 | 64.8  | 75.9                | 16.0      | 177.0                 |
|                                          | Residual   | -1.9             | -4.5 | -4.8  | 1.1                 | 10.0      |                       |
| Total                                    | Count      | 16               | 17   | 105   | 123                 | 26        | 287                   |
|                                          | Exp. Count | 16.0             | 17.0 | 105.0 | 123.0               | 26.0      | 287.0                 |
| Chi-square Tests & Symmetric Measures    |            |                  |      |       |                     |           |                       |
|                                          |            |                  |      |       | Value               | df        | Asymp. Sig. (2-sided) |
| Pearson Chi-square                       |            |                  |      |       | 23.041 <sup>1</sup> | 4         | 0.000                 |
| Likelihood Ratio                         |            |                  |      |       | 31.798              | 4         | 0.000                 |
| Phi                                      |            |                  |      |       | 0.283               | -         | 0.000                 |
| Cramer's V                               |            |                  |      |       | 0.283               | -         | 0.000                 |
| <i>n</i> of valid cases                  |            |                  |      |       | 287                 |           |                       |

<sup>1</sup> 0 cells (0.0%) have expected count less than 5. The minimum expected count is 6.13.

**Table S3.** DSBA\* Quality of School Building and materials Crosstabulation, Chi-square tests & Symmetric Measures: Pupils.

| Quality of School Building and Materials |            |                  |      |       |                     |           |                       |
|------------------------------------------|------------|------------------|------|-------|---------------------|-----------|-----------------------|
| DSBA                                     |            | Unacceptably Bad | Bad  | Fair  | Good                | Very Good | Total                 |
| Old                                      | Count      | 33               | 34   | 125   | 88                  | 20        | 300                   |
|                                          | Exp. Count | 19.2             | 26.6 | 108.9 | 114.4               | 30.9      | 300.0                 |
|                                          | Residual   | 13.8             | 7.4  | 16.1  | -26.4               | -10.9     |                       |
| New                                      | Count      | 16               | 34   | 153   | 204                 | 59        | 466                   |
|                                          | Exp. Count | 29.8             | 41.4 | 169.1 | 177.6               | 48.1      | 466.0                 |
|                                          | Residual   | -13.8            | -7.4 | -16.1 | 26.4                | 10.9      |                       |
| Total                                    | Count      | 49               | 68   | 278   | 292                 | 79        | 766                   |
|                                          | Exp. Count | 49.0             | 68.0 | 278.0 | 292.0               | 19.0      | 766.0                 |
| Chi-square Tests & Symmetric Measures    |            |                  |      |       |                     |           |                       |
|                                          |            |                  |      |       | Value               | df        | Asymp. Sig. (2-sided) |
| Pearson Chi-square                       |            |                  |      |       | 39.956 <sup>1</sup> | 4         | 0.000                 |
| Likelihood Ratio                         |            |                  |      |       | 40.088              | 4         | 0.000                 |
| Phi                                      |            |                  |      |       | 0.228               | -         | 0.000                 |
| Cramer's V                               |            |                  |      |       | 0.228               | -         | 0.000                 |
| <i>n</i> of valid cases                  |            |                  |      |       | 766                 |           |                       |

<sup>1</sup> 0 cells (0.0%) have expected count less than 5. The minimum expected count is 19.19.

**Table S4.** DSBA \* Quality of School Building and materials Crosstabulation, Chi-square tests & Symmetric Measures: Parents/Guardians.

|                                       |            | School Building Quality and Materials |      |       |       |                     |              |                       |
|---------------------------------------|------------|---------------------------------------|------|-------|-------|---------------------|--------------|-----------------------|
| DSBA                                  |            | Unacceptably Bad                      | Bad  | Fair  | Good  | Very Good           | I don't Know | Total                 |
| Old                                   | Count      | 19                                    | 31   | 109   | 86    | 16                  | 11           | 272                   |
|                                       | Exp. Count | 14.9                                  | 21.9 | 83.8  | 97.1  | 38.0                | 16.4         | 272.0                 |
|                                       | Residual   | 4.1                                   | 9.1  | 25.2  | -11.1 | -22.0               | -5.4         |                       |
| New                                   | Count      | 19                                    | 25   | 105   | 162   | 81                  | 31           | 423                   |
|                                       | Exp. Count | 23.1                                  | 34.1 | 130.2 | 150.9 | 59.0                | 25.6         | 423.0                 |
|                                       | Residual   | -4.1                                  | -9.1 | -25.2 | 11.1  | 22.0                | 5.4          |                       |
| Total                                 | Count      | 38                                    | 56   | 214   | 248   | 97                  | 42           | 695                   |
|                                       | Exp. Count | 38.0                                  | 56.0 | 214.0 | 248.0 | 97.0                | 42.0         | 695.0                 |
| Chi-square Tests & Symmetric Measures |            |                                       |      |       |       |                     |              |                       |
|                                       |            |                                       |      |       |       | Value               | df           | Asymp. Sig. (2-sided) |
| Pearson Chi-square                    |            |                                       |      |       |       | 46.475 <sup>1</sup> | 5            | 0.000                 |
| Likelihood Ratio                      |            |                                       |      |       |       | 48.839              | 5            | 0.000                 |
| Phi                                   |            |                                       |      |       |       | 0.259               | -            | 0.000                 |
| Cramer's V                            |            |                                       |      |       |       | 0.259               | -            | 0.000                 |
| n of valid cases                      |            |                                       |      |       |       | 695                 |              |                       |

<sup>1</sup> 0 cells (0.0%) have expected count less than 5. The minimum expected count is 14.87.

**Table S5.** DSBA \* Importance of selection and use in schools of materials friendly to the environment and health Crosstabulation, Chi-square tests & Symmetric Measures: Pupils.

|                                       |            | Importance of Selection & Use in School of Materials Friendly to Environment and Health |                  |                |                     |              |                    |
|---------------------------------------|------------|-----------------------------------------------------------------------------------------|------------------|----------------|---------------------|--------------|--------------------|
| DSBA                                  |            | Slightly Important                                                                      | Fairly Important | Very Important | Extremely Important | I don't know | Total              |
| Old                                   | Count      | 6                                                                                       | 33               | 89             | 165                 | 7            | 300                |
|                                       | Exp. Count | 3.9                                                                                     | 23.1             | 83.8           | 180.9               | 8.2          | 300.0              |
|                                       | Residual   | 2.1                                                                                     | 9.9              | 5.2            | -15.9               | -1.2         |                    |
| New                                   | Count      | 4                                                                                       | 26               | 125            | 297                 | 14           | 466                |
|                                       | Exp. Count | 6.1                                                                                     | 35.9             | 130.2          | 281.1               | 12.8         | 466.0              |
|                                       | Residual   | -2.1                                                                                    | -9.9             | -5.2           | 15.9                | 1.2          |                    |
| Total                                 | Count      | 10                                                                                      | 59               | 214            | 462                 | 21           | 766                |
|                                       | Exp. Count | 10.0                                                                                    | 59.0             | 214.0          | 462.0               | 21           | 766.0              |
| Chi-square Tests & Symmetric Measures |            |                                                                                         |                  |                |                     |              |                    |
|                                       |            |                                                                                         |                  |                | Value               | df           | As. Sig. (2-sided) |
| Pearson Chi-Square                    |            |                                                                                         |                  |                | 11.920 <sup>1</sup> | 4            | 0.018              |
| Likelihood Ratio                      |            |                                                                                         |                  |                | 11.683              | 4            | 0.020              |
| Phi                                   |            |                                                                                         |                  |                | 0.125               | -            | 0.018              |
| Cramer's V                            |            |                                                                                         |                  |                | 0.125               | -            | 0.018              |
| n of valid cases                      |            |                                                                                         |                  |                | 766                 |              |                    |

<sup>1</sup> 1 cell (10.0%) has expected count less than 5. The minimum expected count is 3.92.

**Table S6.** TIRZ \* More efficient and enhanced lighting Crosstabulation, Chi-square tests & Symmetric Measures: Parents/Guardians.

|                                       |            | More Efficient and Enhanced Lighting |                  |                |                     |              | Total              |
|---------------------------------------|------------|--------------------------------------|------------------|----------------|---------------------|--------------|--------------------|
| TIRZ                                  |            | Slightly Important                   | Fairly Important | Very Important | Extremely Important | I don't Know |                    |
| Zone A                                | Count      | 1                                    | 28               | 33             | 49                  | 6            | 117                |
|                                       | Exp. Count | 4.9                                  | 16.7             | 31.3           | 61.5                | 2.5          | 117.0              |
|                                       | Residual   | -3.9                                 | 11.3             | 1.7            | -12.5               | 3.5          |                    |
| Zone B                                | Count      | 21                                   | 51               | 93             | 246                 | 4            | 415                |
|                                       | Exp. Count | 17.5                                 | 59.3             | 111.2          | 218.1               | 9.0          | 415.0              |
|                                       | Residual   | 3.5                                  | -8.3             | -18.2          | 27.9                | -5.0         |                    |
| Zone C                                | Count      | 11                                   | 33               | 84             | 117                 | 7            | 252                |
|                                       | Exp. Count | 10.6                                 | 36.0             | 67.5           | 132.4               | 5.5          | 252.0              |
|                                       | Residual   | 0.4                                  | -3.0             | 16.5           | -15.4               | 1.5          |                    |
| Total                                 | Count      | 33                                   | 112              | 210            | 412                 | 17           | 784                |
|                                       | Exp. Count | 33.0                                 | 112.0            | 210.0          | 412.0               | 17.0         | 784.0              |
| Chi-square Tests & Symmetric Measures |            |                                      |                  |                | Value               | df           | As. Sig. (2-sided) |
| Pearson Chi-Square                    |            |                                      |                  |                | 35.814 <sup>1</sup> | 8            | 0.000              |
| Likelihood Ratio                      |            |                                      |                  |                | 35.448              | 8            | 0.000              |
| Phi                                   |            |                                      |                  |                | 0.214               | -            | 0.000              |
| Cramer's V                            |            |                                      |                  |                | 0.151               | -            | 0.000              |
| N of valid cases                      |            |                                      |                  |                | 784                 |              |                    |

<sup>1</sup> 2 cells (13.3%) have expected count less than 5. The minimum expected count is 2.54.

**Table S7.** DSBA \* Improved acoustics/Noise protection Crosstabulation, Chi-square tests & Symmetric Measures: Pupils.

| Improved Acoustics/Noise Protection   |            |             |                    |                  |                |                     |              |                    |
|---------------------------------------|------------|-------------|--------------------|------------------|----------------|---------------------|--------------|--------------------|
| DSBA                                  |            | Unimportant | Slightly Important | Fairly Important | Very Important | Extremely Important | I don't Know | Total              |
| Old                                   | Count      | 2           | 19                 | 62               | 84             | 123                 | 1            | 291                |
|                                       | Exp. Count | 6.2         | 15.1               | 64.3             | 94.2           | 107.7               | 3.5          | 291.0              |
|                                       | Residual   | -4.2        | 3.9                | -2.3             | -10.2          | 15.3                | -2.5         |                    |
| New                                   | Count      | 14          | 20                 | 104              | 159            | 155                 | 8            | 460                |
|                                       | Exp. Count | 9.8         | 23.9               | 101.7            | 148.8          | 170.3               | 5.5          | 460.0              |
|                                       | Residual   | 4.2         | -3.9               | 2.3              | 10.2           | -15.3               | 2.5          |                    |
| Total                                 | Count      | 16          | 39                 | 166              | 243            | 278                 | 9            | 751                |
|                                       | Exp. Count | 16.0        | 39.0               | 166.0            | 243.0          | 278.0               | 9.0          | 751.0              |
| Chi-square Tests & Symmetric Measures |            |             |                    |                  |                | Value               | df           | As. Sig. (2-sided) |
| Pearson Chi-square                    |            |             |                    |                  |                | 14.639 <sup>1</sup> | 5            | 0.012              |
| Likelihood Ratio                      |            |             |                    |                  |                | 15.954              | 5            | 0.007              |
| Phi                                   |            |             |                    |                  |                | 0.140               | -            | 0.012              |
| Cramer's V                            |            |             |                    |                  |                | 0.140               | -            | 0.012              |
| n of valid cases                      |            |             |                    |                  |                | 751                 |              |                    |

<sup>1</sup> 1 cell (8.3%) has expected count less than 5. The minimum expected count is 3.49.

**Table S8.** TIRZ\* Better air quality Crosstabulation, Chi-square tests & Symmetric Measures: Pupils.

|                                                  |             | <b>Better Air Quality</b> |                         |                       |                            |                           |
|--------------------------------------------------|-------------|---------------------------|-------------------------|-----------------------|----------------------------|---------------------------|
|                                                  | <b>TIRZ</b> | <b>Slightly Important</b> | <b>Fairly Important</b> | <b>Very Important</b> | <b>Extremely Important</b> | <b>Total</b>              |
| Zone A                                           | Count       | 2                         | 22                      | 36                    | 75                         | 135                       |
|                                                  | Exp. Count  | 1.1                       | 13.4                    | 40.5                  | 80.0                       | 135.0                     |
|                                                  | Residual    | 0.9                       | 8.6                     | -4.5                  | -5.0                       |                           |
| Zone B                                           | Count       | 4                         | 46                      | 118                   | 285                        | 453                       |
|                                                  | Exp. Count  | 3.6                       | 44.9                    | 135.8                 | 268.0                      | 453.0                     |
|                                                  | Residual    | 0.4                       | 1.1                     | -17.8                 | 16.4                       |                           |
| Zone C                                           | Count       | 1                         | 19                      | 109                   | 160                        | 289                       |
|                                                  | Exp. Count  | 2.3                       | 28.7                    | 86.7                  | 171.4                      | 289.0                     |
|                                                  | Residual    | -1.3                      | -9.7                    | 22.3                  | -11.4                      |                           |
| Total                                            | Count       | 7                         | 87                      | 263                   | 520                        | 877                       |
|                                                  | Exp. Count  | 7.0                       | 87.0                    | 263.0                 | 520.0                      | 877.0                     |
| <b>Chi-square Tests &amp; Symmetric Measures</b> |             |                           |                         | <b>Value</b>          | <b>DF</b>                  | <b>As. Sig. (2-sided)</b> |
| Pearson Chi-square                               |             |                           |                         | 21.059 <sup>1</sup>   | 6                          | 0.002                     |
| Likelihood Ratio                                 |             |                           |                         | 20.329                | 6                          | 0.002                     |
| Phi                                              |             |                           |                         | 0.155                 | -                          | 0.002                     |
| Cramer's V                                       |             |                           |                         | 0.110                 | -                          | 0.002                     |
| N of valid cases                                 |             |                           |                         | 877                   |                            |                           |

<sup>1</sup> 3 cells (25.0%) have expected count less than 5. The minimum expected count is 1.08.

**Table S9.** TIRZ\* Water efficiency Crosstabulation, Chi-square tests & Symmetric Measures: Pupils.

|                                                  |             | <b>Water efficiency</b> |                           |                         |                       |                            |                     |                           |
|--------------------------------------------------|-------------|-------------------------|---------------------------|-------------------------|-----------------------|----------------------------|---------------------|---------------------------|
|                                                  | <b>TIRZ</b> | <b>Unimportant</b>      | <b>Slightly Important</b> | <b>Fairly Important</b> | <b>Very Important</b> | <b>Extremely Important</b> | <b>I don't Know</b> | <b>Total</b>              |
| Zone A                                           | Count       | 12                      | 11                        | 32                      | 37                    | 36                         | 9                   | 137                       |
|                                                  | Exp. Count  | 5.7                     | 14.1                      | 33.3                    | 34.4                  | 44.1                       | 5.4                 | 137.0                     |
|                                                  | Residual    | 6.3                     | -3.1                      | -1.3                    | 2.6                   | -8.1                       | 3.6                 |                           |
| Zone B                                           | Count       | 18                      | 47                        | 104                     | 123                   | 151                        | 15                  | 458                       |
|                                                  | Exp. Count  | 19.1                    | 47.1                      | 111.3                   | 114.9                 | 147.5                      | 18.1                | 458.0                     |
|                                                  | Residual    | -1.1                    | -0.1                      | -7.3                    | 8.1                   | 3.5                        | -3.1                |                           |
| Zone C                                           | Count       | 7                       | 33                        | 79                      | 62                    | 98                         | 11                  | 290                       |
|                                                  | Exp. Count  | 12.1                    | 29.8                      | 70.5                    | 72.7                  | 93.4                       | 11.5                | 290.0                     |
|                                                  | Residual    | -5.1                    | 3.2                       | 8.5                     | -10.7                 | 4.6                        | -0.5                |                           |
| Total                                            | Count       | 37                      | 91                        | 215                     | 222                   | 285                        | 35                  | 885                       |
|                                                  | Exp. Count  | 37.0                    | 91.0                      | 215.0                   | 222.0                 | 285.0                      | 35.0                | 885.0                     |
| <b>Chi-square Tests &amp; Symmetric Measures</b> |             |                         |                           |                         |                       | <b>Value</b>               | <b>df</b>           | <b>As. Sig. (2-sided)</b> |
| Pearson Chi-square                               |             |                         |                           |                         |                       | 18.769 <sup>1</sup>        | 10                  | 0.043                     |
| Likelihood Ratio                                 |             |                         |                           |                         |                       | 17.316                     | 10                  | 0.068                     |
| Phi                                              |             |                         |                           |                         |                       | 0.146                      | -                   | 0.043                     |
| Cramer's V                                       |             |                         |                           |                         |                       | 0.103                      | -                   | 0.043                     |
| n of valid cases                                 |             |                         |                           |                         |                       | 885                        |                     |                           |

<sup>1</sup> 0 cells (0.0%) has expected count less than 5. The minimum expected count is 5.42.

**Table S10.** PCA of Principals' school-environment desired outcomes: Rotated Component Matrix.

| Desired Outcome                                              | Component 1 | Component 2 | Component 3 |
|--------------------------------------------------------------|-------------|-------------|-------------|
| A. Better air quality                                        | 0.230       | 0.183       | 0.904       |
| B. Toxic-products/substances elimination                     | 0.000       | 0.799       | 0.391       |
| C. Better long-term maintenance                              | 0.674       | 0.494       | 0.124       |
| D. Improved thermal comfort (cool in summer, warm in winter) | 0.608       | 0.645       | -0.093      |
| E. More efficient and enhanced lighting                      | 0.501       | 0.698       | 0.137       |
| F. Energy efficiency                                         | 0.434       | 0.694       | 0.106       |
| G. Water efficiency                                          | 0.703       | 0.262       | 0.387       |
| H. Improved acoustics/ Noise protection                      | 0.775       | 0.272       | 0.244       |
| I. More spacious, natural and attractive environment         | 0.694       | 0.213       | 0.274       |
| J. Innovative use of whole school as teaching-tool           | 0.855       | 0.163       | 0.002       |

**Table S11.** PCA of Teachers' school-environment desired outcomes: Rotated Component Matrix.

| Desired Outcome                                              | Component 1 | Component 2 | Component 3 |
|--------------------------------------------------------------|-------------|-------------|-------------|
| A. Better air quality                                        | 0.236       | 0.257       | 0.765       |
| B. Toxic-products/substances elimination                     | 0.122       | 0.054       | 0.865       |
| C. Better long-term maintenance                              | 0.649       | 0.334       | 0.145       |
| D. Improved thermal comfort (cool in summer, warm in winter) | 0.827       | 0.118       | 0.109       |
| E. More efficient and enhanced lighting                      | 0.859       | 0.079       | 0.141       |
| F. Energy efficiency                                         | 0.349       | 0.784       | 0.034       |
| G. Water efficiency                                          | 0.171       | 0.821       | 0.325       |
| H. Improved acoustics/ Noise protection                      | 0.650       | 0.340       | 0.383       |
| I. More spacious, natural and attractive environment         | 0.680       | 0.440       | 0.116       |
| J. Innovative use of whole school as teaching-tool           | 0.639       | 0.327       | 0.207       |

**Table S12.** PCA of Pupils' school-environment desired outcomes: Rotated Component Matrix.

| Desired Outcome                                              | Comp. 1 | Comp. 2 | Comp. 3 | Comp. 4 |
|--------------------------------------------------------------|---------|---------|---------|---------|
| A. Better air quality                                        | 0.304   | 0.114   | 0.734   | 0.084   |
| B. Toxic-products/substances elimination                     | 0.057   | 0.141   | 0.842   | 0.058   |
| C. Better long-term maintenance                              | 0.229   | 0.213   | 0.511   | 0.381   |
| D. Improved thermal comfort (cool in summer, warm in winter) | 0.768   | 0.022   | 0.260   | 0.117   |
| E. More efficient and enhanced lighting                      | 0.729   | 0.302   | 0.133   | 0.195   |
| F. Energy efficiency                                         | 0.218   | 0.877   | 0.172   | 0.107   |
| G. Water efficiency                                          | 0.168   | 0.887   | 0.166   | 0.113   |
| H. Improved acoustics/ Noise protection                      | 0.652   | 0.295   | 0.122   | 0.260   |
| I. More spacious, natural and attractive environment         | 0.411   | 0.064   | 0.130   | 0.727   |
| J. Innovative use of whole school as teaching-tool           | 0.098   | 0.131   | 0.100   | 0.888   |

**Table S13.** PCA of Parents'/Guardians' school-environment desired outcomes: Rotated Component Matrix.

| Desired Outcome                                              | Comp. 1 | Comp. 2 | Comp. 3 |
|--------------------------------------------------------------|---------|---------|---------|
| A. Better air quality                                        | 0.334   | 0.208   | 0.762   |
| B. Toxic-products/substances elimination                     | 0.174   | 0.142   | 0.855   |
| C. Better long-term maintenance                              | 0.553   | 0.353   | 0.116   |
| D. Improved thermal comfort (cool in summer, warm in winter) | 0.673   | 0.214   | 0.354   |
| E. More efficient and enhanced lighting                      | 0.702   | 0.358   | 0.297   |
| F. Energy efficiency                                         | 0.317   | 0.857   | 0.202   |
| G. Water efficiency                                          | 0.283   | 0.874   | 0.180   |
| H. Improved acoustics/ Noise protection                      | 0.736   | 0.273   | 0.208   |
| I. More spacious, natural and attractive environment         | 0.813   | 0.121   | 0.176   |
| J. Innovative use of whole school as teaching-tool           | 0.746   | 0.238   | 0.166   |
